# Supplementary material for: CRISPR/Cas9-Mediated Knockout of the Lycopene ε-Cyclase for Efficient Astaxanthin Production in the Green Microalga Chlamydomonas reinhardtii
Source: MDPI journal article supplement (doi:10.3390/plants13101393), 2024-05-17
Supplement: s1 [file s1]

# LCYE sgRNA target site

|         |                   | 5'        | <i>aphVII</i> cassette inserts / position and orientation                                                                                          |  |  | 3'        |        |
|---------|-------------------|-----------|----------------------------------------------------------------------------------------------------------------------------------------------------|--|--|-----------|--------|
|         |                   | insertion |                                                                                                                                                    |  |  | insertion |        |
| UVM4    | GCCGGAGCTCTCCATTC | -         | -                                                                                                                                                  |  |  | -         | CAGCGG |
| ΔLCYE#1 | GCCGGAGCTCTCCATTC | 83        | <div>bp 26 - bp 1517</div>                                       |  |  | 0         | CAGCGG |
| ΔLCYE#2 | GCCGGAGCTCTCCATT- | 3         | <div>bp 1631 - bp 3</div>                                        |  |  | 0         | CAGCGG |
| ΔLCYE#3 | GCCGGAGCTCTCCATTC | 0         | <div>bp 53 - bp 1596    bp 1245 - bp 1589    bp 599 - 990</div>  |  |  | 0         | --GCGG |
| ΔLCYE#4 | GCCGGAGCTCTCC---- | 1         | <div>bp 1175 - bp 1463    bp 1173 - bp 973</div>                |  |  | 0         | CAGCGG |

**Supplementary Figure S1:** The table presents the sgRNA binding sequence with PAM motif in red and the respective sequence for four selected ΔLCYE mutants (ΔLCYE#1-4). The position and orientation of individual *aphVII* cassette integrations is displayed for the promotor sequence (green arrow), *aphVII* coding sequence (orange arrow) and terminator (gray). Symbols do not represent actual sequence length. Length of integrated *aphVII* cassette and additional random DNA fragments at the 5' and 3' ends are indicated.

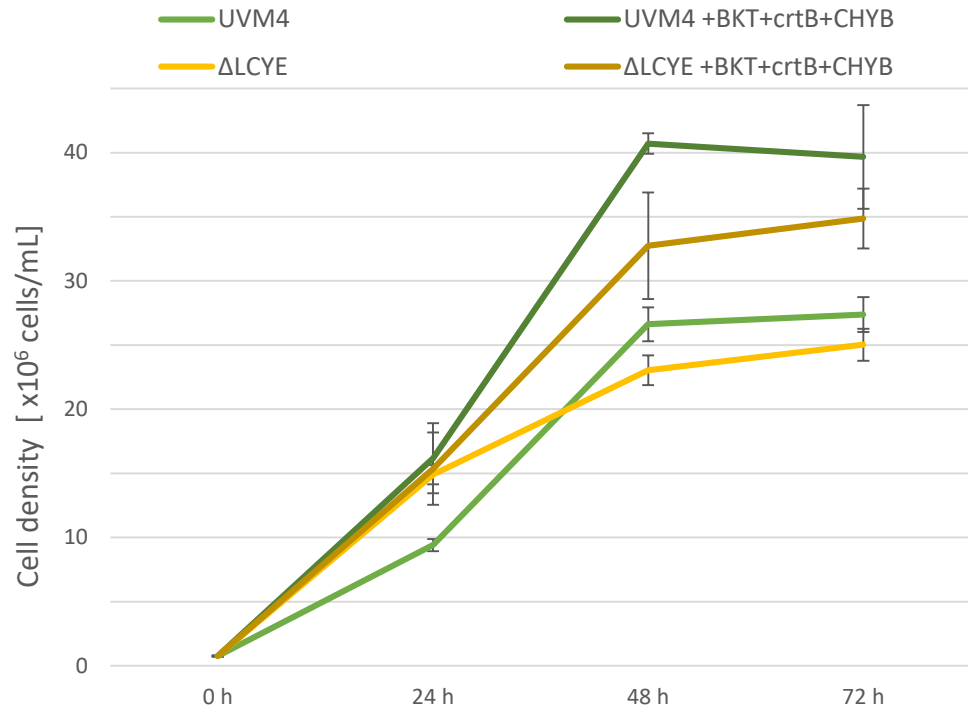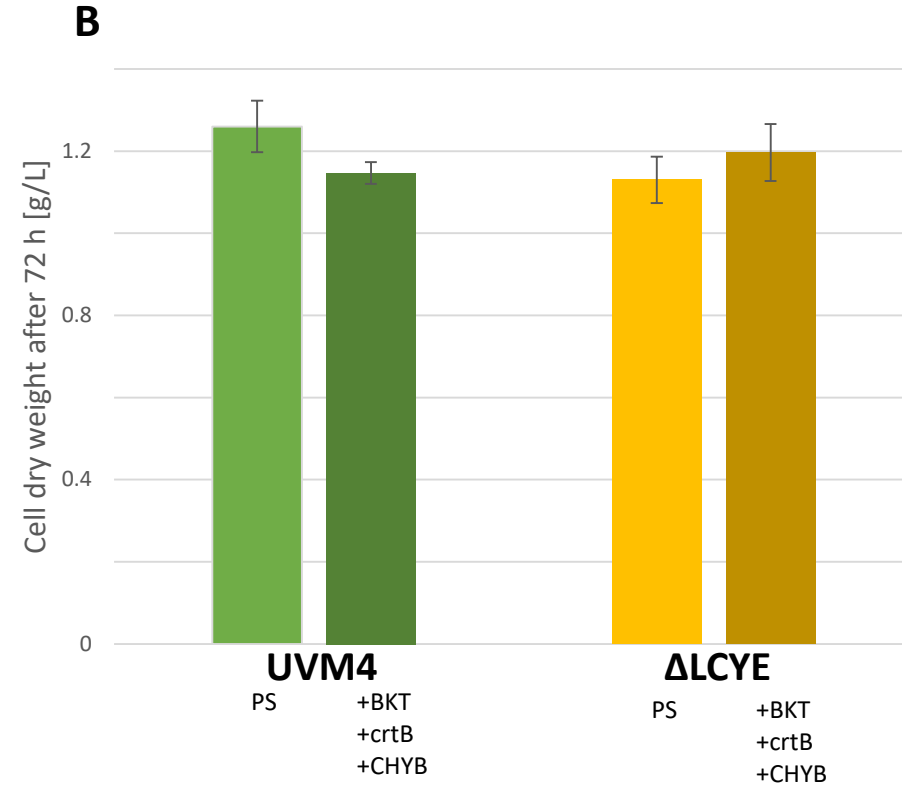

**Supplementary Figure S2:** Biomass accumulation for parental strains and engineered production lines for efficient astaxanthin biosynthesis. A) Cell density measurements for UVM4, ΔLCYE#3 and a selected transformant for each strain co-expressing *CrBKT*, *PacrtB* and *CrCHYB* for production of astaxanthin (Figure 3). Cultivations were performed in 100 mL shake flasks for a cultivation period of 72 h in TAP medium and a constant illumination of 500  $\mu\text{mol photons/m}^2/\text{s}$ . B) Gravimetric cell dry weight quantification after 72 h cultivation. All quantifications are given as mean values, and error bars display the standard deviation of three individual measurements from biological replicates. PS – parental strain
